# Supplementary material for: Phenolic composition and antioxidant capacity of hawthorn ( Crataegus oxyacantha L.) flowers and fruits grown in Algeria
Source: publisher site journal article supplement (doi:10.1515/jcim-2018-0125), 2020-03-31
Supplement: Supplementary file 1 [file Supplementary Data (Appendix A).docx]

**Appendix A**

**Figure captions**

**Fig. A.1.** UV spectra of some peaks representing the classes of phenol compounds detected in Algerian hawthorn flowers and fruits.

**Peak 3**

**Peak 4**

**Peak 5**

**Peak 6**

**Peak 12**

**Peak 14**

**Fig. A.1.**
